# Supplementary material for: Molecular insights into the water dissociation and proton dynamics at the β-TaON (100)/water interface
Source: Royal Society of Chemistry journal article supplement (doi:10.1039/d4cp01219d), 2024-01-01
Supplement: d4cp01219d1.pdf [file d4cp01219d1.pdf]

**Supporting Information:**  
**Molecular Insights into the Water Dissociation and Proton  
Dynamics at the  $\beta$ -TaON (100)/Water Interface**

Sagarmoy Mandal<sup>1,2</sup> and Tushar Kanti Ghosh<sup>1,2,\*</sup>

<sup>1</sup>*Department of Chemistry, Indian Institute of Technology Kanpur, Kanpur - 208016, India*

<sup>2</sup>*Present address: Department of Chemistry, Purdue University,  
West Lafayette, Indiana 47907, USA*

---

\* tkghosh@purdue.edu

## S1. Input Files for Simulation

The CPMD input files and the coordinate file (in XYZ format) for modeling the  $\beta$ -TaON (100)/Water interface are available via the GitHub Repository at [https://github.com/mandal13/TaON\\_100\\_Water](https://github.com/mandal13/TaON_100_Water).
